# Supplementary material for: A high-performance broadband double-junction photodetector based on silicon nanowire arrays wrapped by silver nanoparticles for low-light imaging
Source: Royal Society of Chemistry journal article supplement (doi:10.1039/d3tc01261a), 2023-01-01
Supplement: d3tc01261a1.pdf [file d3tc01261a1.pdf]

## Electronic Supplementary Information

### **A high-performance broadband double-junction photodetector based on silicon nanowire arrays wrapped by silver nanoparticles for low-light imaging**

Yuting Huang,<sup>a</sup> Haifeng Liang,<sup>\*b</sup> Yingli Zhang,<sup>a</sup> Shujing Yin,<sup>a</sup> Xuyang Li,<sup>a</sup> Changlong Cai,<sup>a</sup> Weiguo Liu<sup>a</sup> and Tiantian Jia<sup>c</sup>

<sup>a</sup> Key laboratory for optical measurement and thin films of Shaanxi Province, Xi'an Technological University, Xi'an, Shaanxi 710021, China

<sup>b</sup> College of integrated circuits and optoelectronic chips, Shenzhen Technology University, Shenzhen, Guangdong 518118, China

<sup>c</sup> Key Laboratory of Low-Light-Level Night Vision Technology, Xi'an, Shaanxi 710065, China

\*Corresponding author: E-mail: lianghaifeng@xatu.edu.cn

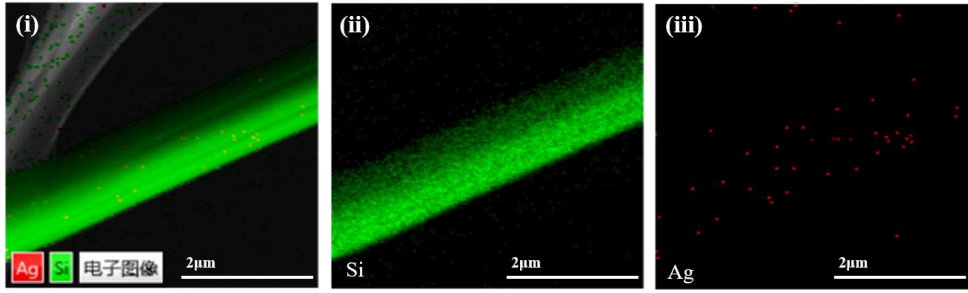

**Fig. S1** Energy spectrum mapping of (i) silicon and silver elements of layer image, (ii) silicon and (iii) silver elements.

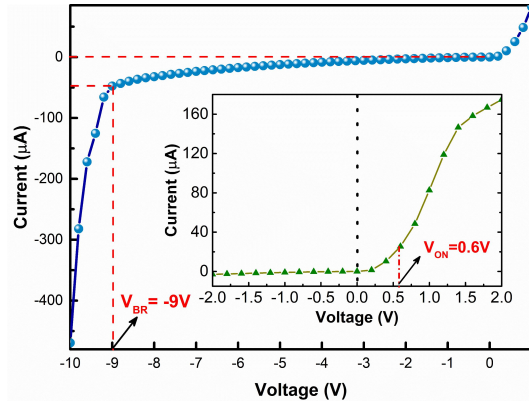

**Fig. S2**  $I$ - $V$  characteristic curve of the device measured in 650 nm irradiation, the breakdown voltage was approximately -9 V, and the inset shows the turn-on voltage was 0.6 V.

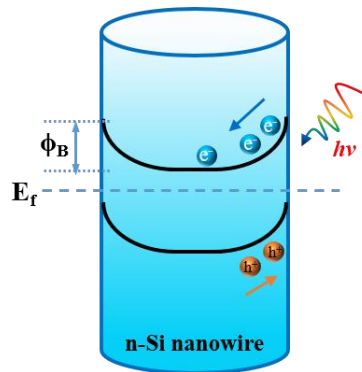

**Fig. S3** Nanowire surface band bending and photogenerated carriers are separated under illumination,  $\phi_B$  the recombination barrier.

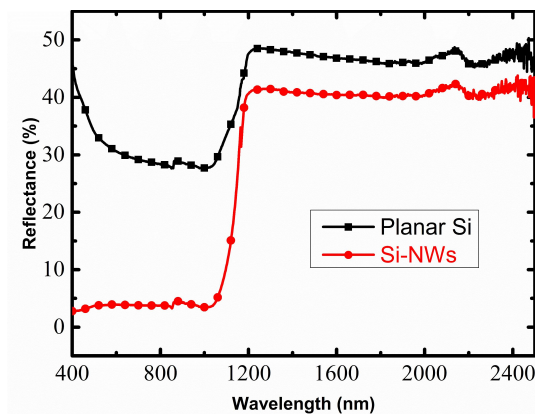

**Fig. S4** UV-vis-NIR reflectance spectra of the SiNW arrays and planar Si.

**Table S1.** Comparison of the typical figure of merits between our NN<sup>+</sup>/MS double junction enhanced SiNWs@AgNPs photodetector and other reported the nanowire silicon-based devices, mainly including  $R$ , Response wavelength range,  $D^*$ ,  $I_{dark}$ , response speed (rise/fall time), and weak light sensitivity (low light intensity that can be detected).

| Category                                                                               | Devices                                                     | $R$<br>[A/W]     | Photo-<br>response<br>range<br>[ $\mu\text{m}$ ] | $D^*$<br>[cm Hz <sup>1/2</sup> /W] | $I_{dark}$<br>[A]        | Rise/fall<br>time<br>[ $\mu\text{s}$ ] | Low power<br>intensity                                              | Ref.         |
|----------------------------------------------------------------------------------------|-------------------------------------------------------------|------------------|--------------------------------------------------|------------------------------------|--------------------------|----------------------------------------|---------------------------------------------------------------------|--------------|
| Junction<br>structure                                                                  | p-SiNWs/nCdS<br>nanoparticles                               | 0.821<br>@900 nm | 0.2-1.1                                          | $1.21 \times 10^{12}$              | $\sim 2 \times 10^{-7}$  | 203 ms/<br>429 ms                      | $8 \mu\text{W}/\text{cm}^2 \sim$<br>$1 \text{ mW}/\text{cm}^2$      | 1            |
|                                                                                        | PdSe <sub>2</sub> /SiNWA                                    | 0.726<br>@980 nm | 0.2–2                                            | $3.19 \times 10^{14}$              | $\sim 10^{-10}$          | 3.4/3.9                                | $27.5 \sim 56.6$<br>$\text{nW}/\text{cm}^2$                         | 2            |
|                                                                                        | MoS <sub>2</sub> /Al <sub>2</sub> O <sub>3</sub> /SiN<br>Ws | 0.61<br>@808 nm  | 0.3-1.6                                          | $1.48 \times 10^{12}$              | $\sim 10^{-9}$           | 8.4/40.9                               | $1.4 \text{ nW}/\text{cm}^2 \sim$<br>$714.3 \text{ mW}/\text{cm}^2$ | 3            |
|                                                                                        | perovskite<br>nanowires/Au                                  | 37.14<br>@473 nm | 0.35-0.9                                         | $2.06 \times 10^{13}$              | $\sim 10^{-10}$          | 91/563                                 | $1.45 \text{ nW}/\text{cm}^2 \sim$<br>$145 \text{ mW}/\text{cm}^2$  | 4            |
| plasmonic<br>enhanced<br>detector                                                      | AgNP/SiOx<br>NW/Si                                          | 1.54<br>@370nm   | 0.3-0.85                                         | $2.12 \times 10^{10}$              | $\sim 10^{-10}$          | 0.12s/<br>0.11s                        | /                                                                   | 5            |
|                                                                                        | rGO: AuCQD/Si<br>NW                                         | 0.5<br>@940nm    | 0.36-0.94                                        | $1.4 \times 10^{12}$               | $\sim 10^{-10}$          | 750ms/<br>667ms                        | $0.2 \mu\text{W}/\text{cm}^2 \sim$<br>$0.6 \text{ mW}/\text{cm}^2$  | 6            |
|                                                                                        | MoS <sub>2</sub> /AgNPs/Si<br>NWs                           | 402.4<br>@532nm  | 0.405-<br>0.635                                  | $2.34 \times 10^{12}$              | $\sim 10^{-4}$           | 41ms/<br>37ms                          | $0.13 \sim 231.7$<br>$\text{mW}/\text{cm}^2$                        | 7            |
|                                                                                        | Au antennas/All-<br>Si                                      | 0.05<br>@980nm   | 0.8-1.6                                          | $2 \times 10^{11}$                 | /                        | /                                      | /                                                                   | 8            |
|                                                                                        | Perovskite/Au<br>squares/Si/SiO                             | 4.2<br>@800nm    | 0.6-0.9                                          | $7.1 \times 10^{11}$               | $\sim 10^{-9}$           | /                                      | $1 \text{ mW}/\text{cm}^2$                                          | 9            |
|                                                                                        | rGO/CQD/AgNP<br>/Si                                         | 0.3<br>@940nm    | 0.36-0.94                                        | $4.1 \times 10^{11}$               | $\sim 10^{-9}$           | 556 ms/<br>526 ms                      | $1 \mu\text{W}/\text{cm}^2 \sim$<br>$1 \text{ mW}/\text{cm}^2$      | 10           |
| NN <sup>+</sup> /MS<br>double<br>junction<br>structure<br>and<br>plasmonic<br>enhanced | SiNWs/AgNPs                                                 | 2.2<br>@980nm    | 0.254-2.2                                        | $5.1 \times 10^{14}$               | $\sim 2 \times 10^{-12}$ | 25/62                                  | $1.4 \text{ nW}/\text{cm}^2 \sim$<br>$64.3 \text{ mW}/\text{cm}^2$  | This<br>work |

$R$ ,  $D^*$ , and  $I_{dark}$  represent responsivity, specific detectivity, and dark current, respectively. rGO and CQD represent reduced graphene oxide, quantum dot.

## Supplementary References

- 1 A. Chandra, S. Giri, B. Das, S. Ghosh, S. Sarkar and K. K. Chattopadhyay, *Appl. Surf. Sci.*, 2021, **548**, 149256.
- 2 D. Wu, C. Jia, F. Shi, L. Zeng, P. Lin, L. Dong, Z. Shi, Y. Tian, X. Li and J. Jie, *J. Mater. Chem. A*, 2020, **8**, 3632-3642.
- 3 J. Mao, B. Zhang, Y. Shi, X. Wu, Y. He, D. Wu, J. Jie, C.-S. Lee and X. Zhang, *Adv. Funct. Mater.*, 2022, **32**, 2108174.
- 4 D. Wu, Y. Xu, H. Zhou, X. Feng, J. Zhang, X. Pan, Z. Gao, R. Wang, G. Ma, L. Tao, H. Wang, J. Duan, H. Wan, J. Zhang, L. Shen, H. Wang and T. Zhai, *InfoMat.*, 2022, **4**, e12320.
- 5 N. M. Devi, S. A. Lynrah, R. Rajkumari and N. K. Singh, *Sens. Actuators A: Phys.*, 2021, **327**, 112744.
- 6 K. Sarkar, P. Devi, A. Lata, V. K. Lokku and P. Kumar, *Adv. Opt. Mater.*, 2020, **8**, 2000228.
- 7 C.-H. Mao, A. Dubey, F.-J. Lee, C.-Y. Chen, S.-Y. Tang, A. Ranjan, M.-Y. Lu, Y.-L. Chueh, S. Gwo and T.-J. Yen, *ACS Appl. Mater. Interfaces*, 2021, **13**, 4126-4132.
- 8 B. Feng, J. Zhu, B. LU, F. Liu, L. Zhou and Y. Chen, *ACS Nano*, 2019, **13**, 8433-8441.
- 9 B. Du, W. Yang, Q. Jiang, H. Shan, D. Luo, B. Li, W. Tang, F. Lin, B. Shen, Q. Gong, X. Zhu, R. Zhu and Z. Fang, *Adv. Optical Mater.*, 2018, **6**, 1701271.
- 10 K. Sarkar, P. Devi, A. Lata, R. Ghosha and P. Kumar, *J. Mater. Chem. C*, 2019, **7**, 13182.
